# Supplementary material for: Mycobacterium tuberculosis Ser/Thr Protein Kinase B Mediates an Oxygen-Dependent Replication Switch
Source: PLoS Biol. 2014 Jan 7;12(1):e1001746. doi: 10.1371/journal.pbio.1001746 (PMC3883633; doi:10.1371/journal.pbio.1001746)
Supplement: Data S1 — Staurosporine binding profile in the Mtb proteome. Rv numbers, fold change between staurosporine treated and untreated samples, and peptide ion abundance as log2 are shown. (XLSX) [file pbio.1001746.s001.xlsx]

## Sheet: Raw data
Description	LocusTag	Protein	Heatmap Position	Inhib_Stauro_Avg	No_Inhib_Avg	Fold Change		Inhib_Stauro_1	Inhib_Stauro_2	Inhib_Stauro_3	Inhib_Stauro_4	Inhib_Stauro_5	Inhib_Stauro_6	Inhib_Stauro_7	No_Inhib_1	No_Inhib_2	No_Inhib_3	No_Inhib_4	No_Inhib_5	No_Inhib_6	No_Inhib_7	No_Inhib_8	PepCount
TRANSMEMBRANE SERINE/THREONINE-PROTEIN KINASE F PKNF (PROTEIN KINASE F) (STPK F)	Rv1746	CAB09332.1	M7	0	15.3564	totally inhibited		14.9408	15.0399	15.3254	14.8599	14.6535	15.634	13.4962	20.2368	20.3782	19.5949	20.0542	19.9013	21	20.7752	20.6232	18
TRANSMEMBRANE SERINE/THREONINE-PROTEIN KINASE D PKND (PROTEIN KINASE D) (STPK D)	Rv0931c	CAB08487.1	C5	14.85	20.3205	44.3391		17.0171	16.1187	17.0542	17.0573	17.7054	17.0621	17.2773	20.5212	20.2268	20.4093	19.2745	20.1931	20.9304	20.6808	20.7938	7
TRANSMEMBRANE SERINE/THREONINE-PROTEIN KINASE B PKNB (PROTEIN KINASE B) (STPK B)	Rv0014c	CAB02434.1	B1	17.0417	20.3787	10.105									14.098	15.8986	16.0946	15.3925	15.4272	14.873	16.1593	14.9082	2
POSSIBLE FATTY ACID SYNTHASE	Rv3720	CAA18042.1	J13	15.7265	18.7034	7.87267		14.8646	15.0055	16.659	15.713	16.3907	15.6318	15.8211			18.5819			18.7903	18.7379		3
METHOXY MYCOLIC ACID SYNTHASE 4 MMAA4 (METHYL MYCOLIC ACID SYNTHASE 4) (MMA4) (HYDROXY MYCOLIC ACID SYNTHASE)	Rv0642c	CAB07101.1	K3	17.2206	19.4945	4.83626			16.5059	18.8304	16.4774		13.9084	15.9421		17.9616	18.2079		18.8363	18.4725	19.0146		3
PROBABLE DNA/PANTOTHENATE METABOLISM FLAVOPROTEIN HOMOLOG DFP	Rv1391	CAB02174.1	J6	16.3329	18.4986	4.48687		20.4262	14.7271	19.9343	14.1671	20.7502	15.2897	15.2494	20.3073	20.2961	19.0062	20.0921	19.9629	18.8145	19.6267	17.8498	3
TRK SYSTEM POTASSIUM UPTAKE PROTEIN CEOB	Rv2691	CAE55513.1	B11	15.5958	17.3659	3.41068		15.4784	16.3431	15.1632	14.99	15.3988	15.3456	16.4518	18.4088	18.692	17.2543	18.1923	18.1503	15.5441	16.9684	15.7171	2
POSSIBLE L-LACTATE DEHYDROGENASE (CYTOCHROME) LLDD2	Rv1872c	CAB06144.1	E8	16.2182	17.9739	3.37705		13.9452	14.2169	18.4075	17.4475	15.6932	16.0646	17.7522			17.8362	16.2769	18.6098	18.5511		18.5957	2
PROBABLE ENOYL-CoA HYDRATASE ECHA5 (ENOYL HYDRASE) (UNSATURATED ACYL-CoA HYDRATASE) (CROTONASE)	Rv0675	CAE55310.1	O3	15.7986	17.3137	2.85828		15.8038	16.4934	16.2921	16.4521	15.2287	15.9785	14.3415	17.5252	17.4162	16.7516	17.5651	17.508	17.1724	17.3111	17.2604	2
CONSERVED HYPOTHETICAL PROTEIN	Rv2718c	CAB09459.1	F11	19.272	20.6991	2.68902		21.3012		19.1363		17.3787				20.9426	20.7882		20.772	20.5715	20.2588	20.8617	2
ACETYL-COENZYME A SYNTHETASE ACS (ACETATE--CoA LIGASE) (ACETYL-CoA SYNTHETASE) (ACETYL-CoA SYNTHASE) (ACYL-ACTIVATING ENZYME) (ACETATE THIOKINASE) (ACETYL-ACTIVATING ENZYME) (ACETATE--COENZYME A LIGASE) (ACETYL-COENZYME A SYNTHASE)	Rv3667	CAA17989.1	H13	16.2236	17.3953	2.25271		14.5264		17.7079		16.4365					17.8494	16.5144	17.1671	17.7221	17.3586	17.76	3
PROBABLE ATP SYNTHASE DELTA CHAIN ATPH	Rv1307	CAA97740.1	D6	18.6707	19.7997	2.18701		19.4692		16.9638	18.7736		19.0157	19.1314				20.0103	19.9766		19.4121		2
CONSERVED HYPOTHETICAL PROTEIN TB31.7	Rv2623	CAB08619.1	O10	18.8379	19.9569	2.17191		15.6966	16.7037	15.9695	16.0892	16.2703	15.8131	16.1087	17.5219	17.2499	17.6081	18.2983	17.6323	16.1575	17.1742	15.9488	2
PROBABLE TRANSCRIPTION-REPAIR COUPLING FACTOR MFD (TRCF)	Rv1020	CAB06859.1	F5	16.093	17.1989	2.15229		14.0019	13.0223	15.0807	14.2281		15.4181	13.6138	15.84	15.1211	14.4256	14.874		15.6579	15.0591	15.6351	2
POSSIBLE TRANSMEMBRANE PROTEIN	Rv0426c	CAB06566.1	L2	18.3696	19.3843	2.02047		18.5342	18.1956	18.2388	18.0868	18.6624	18.3688	17.8307	20.0988	20.0946	18.4137	19.8386	18.6228	18.3551	18.3575	18.4521	3
PROBABLE BIFUNCTIONAL FAD SYNTHETASE/RIBOFLAVIN BIOSYNTHESIS PROTEIN RIBF: RIBOFLAVIN KINASE (FLAVOKINASE) + FMN ADENYLYLTRANSFERASE (FAD PYROPHOSPHORYLASE) (FAD SYNTHETASE)(FAD DIPHOSPHORYLASE) (FLAVIN ADENINE DINUCLEOTUDE SYNTHETASE)	Rv2786c	CAA15581.1	K11	14.2275	15.2304	2.0041		17.9266	18.212	16.7322	18.2945	18.5823	18.0141	16.8493	18.977	18.9435	17.6429	19.4883	19.4238	18.4912		17.9825	2
CONSERVED HYPOTHETICAL PROTEIN	Rv1314c	CAA97747.1	H6	14.8065	15.752	1.92586			14.9373		14.6939	14.9723	15.2207	14.2085	15.5796	15.2949	15.9991	16.2903	16.1442	15.4463	15.7452	15.5167	2
PROBABLE SOLUBLE PYRIDINE NUCLEOTIDE TRANSHYDROGENASE STHA (STH) (NAD(P)(+) TRANSHYDROGENASE [B-SPECIFIC]) (NICOTINAMIDE NUCLEOTIDE TRANSHYDROGENASE)	Rv2713	CAB09473.1	D11	15.7943	16.729	1.91147		18.6859	18.1303	18.4058	18.0599	18.8672	17.7996	18.6386	19.7766	19.2449	18.6381	19.4205	20.2186	19.2392	19.1881	19.3485	4
PROBABLE RIBONUCLEOSIDE-DIPHOSPHATE REDUCTASE (LARGE SUBUNIT) NRDZ (RIBONUCLEOTIDE REDUCTASE)	Rv0570	CAA17441.1	I3	17.8016	18.707	1.87316		14.495	16.1013	16.3822	16.6025	14.3449	16.7268	15.9072	17.6416	17.2057	16.7114	16.9134	16.6147	17.2259	15.5253	15.9937	2
PROBABLE TRYPTOPHANYL-TRNA SYNTHETASE TRPS (TRYPTOPHAN--TRNA LIGASE) (TRPRS) (TRYPTOPHAN TRANSLASE)	Rv3336c	CAA17108.1	O12	17.3405	18.2162	1.83484		15.8273	14.9622	15.5925	15.296	13.8428	15.377	15.2286	15.9772	16.4407	16.3056	15.5044	15.723		16.1712		2
PROBABLE BIFUNCTIONAL ENZYME CYSN/CYSC: SULFATE ADENYLTRANSFERASE (SUBUNIT 1) + ADENYLYLSULFATE KINASE	Rv1286	CAA97752.1	A6	14.2724	15.1396	1.82416		17.55	15.5436	18.2575	13.7112	17.9039	18.1282	20.2895		17.8781	19.334	19.9201	18.9848	17.0374	17.0169	17.3421	2
CONSERVED HYPOTHETICAL PROTEIN	Rv2466c	CAA16043.1	D10	15.1609	16.0203	1.81431		16.144	16.028	16.3384	15.8352	15.8268	16.3567	16.0715	17.2813	16.3497	16.832	17.082	16.9125	17.0353	16.7004	17.1477	2
HYPOTHETICAL PROTEIN	Rv3818	CAB10015.1	L13	16.0858	16.9176	1.7799		13.9723	15.9957	16.5691	17.2174		16.0316	15.7726						16.752			2
CONSERVED HYPOTHETICAL PROTEIN	Rv0831c	CAA17637.1	N4	15.9265	16.752	1.77222		20.4538	21.2845	21.7476	21.3007	20.5343	21.6467	20.7717	21.2002	21.2335	21.453	21.9369	22.0099	22.215	21.9937	22.4797	13
PROBABLE ACYL-CoA DEHYDROGENASE FADE12	Rv0972c	CAB02006.1	E5	14.276	15.0458	1.70495		18.3188	17.5346		17.1844	18.3444	17.7818	17.6841	18.3797	20.5405	15.8865	18.5102	18.4084	15.7535	20.492	18.1064	3
PUTATIVE CELL DIVISION ATP-BINDING PROTEIN FTSE (SEPTATION COMPONENT-TRANSPORT ATP-BINDING PROTEIN ABC TRANSPORTER)	Rv3102c	CAB08392.1	H12	18.2739	19.0291	1.68791		17.8397	16.7869	17.6803	16.114	18.1895	17.1815	17.1353	17.6728	17.8492	17.6287	17.3516	18.1579	18.0472	17.6135	17.6383	4
CONSERVED HYPOTHETICAL PROLINE AND ALANINE RICH PROTEIN	Rv3876	CAA17968.1	N13	16.8421	17.5935	1.68332			14.6554	13.1343	14.5163	14.0684	14.6688	14.6131	15.6512		15.6168		14.5135		14.4017		2
CONSERVED HYPOTHETICAL PROTEIN	Rv3871	CAA17963.1	M13	14.1783	14.9015	1.6508		13.6691	13.9506	14.3989		14.4271	14.706	13.9183	15.7064	14.3526	14.213	15.8772	15.3948	14.1641	14.6024		2
CONSERVED HYPOTHETICAL PROTEIN	Rv1770	CAB09313.1	B8	16.6769	17.3919	1.64144		14.5923		12.9384	14.9549	14.8891	13.976	14.2836	15.3105	15.0545	14.9219	14.8075		15.5099	15.2333		2
POSSIBLE CONSERVED MEMBRANE PROTEIN	Rv0284	CAA17359.1	E2	21.1056	21.8152	1.63534		18.0207	17.3426	15.6994	17.667	18.4417	15.0519	16.0765	17.8683	18.0649	17.1098	17.752	17.5895	18.3695	15.601	18.3682	3
PROBABLE TRANSCRIPTIONAL REGULATORY PROTEIN WHIA	Rv1423	CAB02171.1	M6	16.9	17.5904	1.61375		14.1789	14.1807	13.6885	14.6971	12.8694	14.6069	13.6283	14.7895	14.6507	14.7925	15.168	14.1286	14.3974	14.5016	14.8509	2
PROBABLE ACYL-CoA DEHYDROGENASE FADE5	Rv0244c	CAA17336.1	B2	13.9785	14.6599	1.60365		18.1381	17.7839	18.3147	17.1543	18.4237	17.8194	17.5354	19.0174	18.2459	18.0303	18.4446	18.2388	18.5934	18.1596	18.3169	3
PUTATIVE FERREDOXIN REDUCTASE	Rv0688	CAB06451.1	C4	16.9457	17.6227	1.59882		17.0212	17.0672	17.1416	16.731	17.5181	16.9834	16.1575	17.4442	17.8002	17.8088	18.1284	18.089	17.2254	17.281	17.2049	2
CONSERVED HYPOTHETICAL PROTEIN	Rv1896c	CAB10036.1	G8	17.7386	18.3659	1.5446		18.0702	17.4824	17.8691	18.2883	18.1253	17.8168	17.5562	18.1317	18.4266	18.4402	18.4156	18.3348	18.2638	18.1863	18.2353	4
POSSIBLE PROTEIN TRANSPORT PROTEIN SECE2	Rv0379	CAE55277.1	F2	16.3824	16.972	1.50476		16.795	16.8682	16.3954	16.1907	17.5277	16.8254	16.1359	17.7862	17.5799	16.7658	17.78	17.6353	17.4318	16.9674	17.1885	2
PROBABLE ACETYL-/PROPIONYL-CoA CARBOXYLASE (BETA SUBUNIT) ACCD1	Rv2502c	CAB08920.1	H10	16.6097	17.1856	1.4906		15.2557	15.9471	15.1173	15.9148	15.2482	15.7656	16.1115	15.7299	15.9407	16.1579	16.8144	16.6624	15.8078	16.4077	15.743	2
PROBABLE FATTY-ACID-CoA LIGASE FADD6 (FATTY-ACID-CoA SYNTHETASE) (FATTY-ACID-CoA SYNTHASE)	Rv1206	CAB07829.1	K5	16.9586	17.5301	1.48609		18.2716	17.4957	17.6664	17.5254	18.0303	17.4399	17.7412	18.3657	18.4548	17.9305	18.5144	18.665	18.3636	18.5137	18.1193	2
Possible pyridoxine biosynthesis protein	Rv2606c	CAB08614.1	M10	15.7245	16.2947	1.48472		19.1301	18.4784	18.844	18.3742	18.9796	19.2503	18.8063	19.5525	19.1901	18.881	19.2314	19.0643	19.4428	19.3631	19.5231	4
METHOXY MYCOLIC ACID SYNTHASE 2 MMAA2 (METHYL MYCOLIC ACID SYNTHASE 2) (MMA2) (HYDROXY MYCOLIC ACID SYNTHASE)	Rv0644c	CAB07103.1	L3	16.9437	17.5109	1.48164		16.6387	16.6954		16.7429	15.4566	16.9428	15.8182	17.333	16.7426	16.6266	16.3261	15.8542	17.5496	17.3117	18.032	2
PROBABLE dTDP-RHA:A-D-GlcNAc-DIPHOSPHORYL POLYPRENOL, A-3-L-RHAMNOSYL TRANSFERASE WBBL1 (ALPHA-L-RHAMNOSE-(1-_3)-ALPHA-D-GlcNAc(1-_P)-P-DECAPRENY L)	Rv3265c	CAE55576.1	M12	15.3351	15.8926	1.47173		17.0625	15.7808	16.7711	16.1197	16.5163	16.9016	17.116	16.6124	17.1692	17.3638	16.9166	17.2336	17.4463	17.4905	17.2524	4
PROBABLE METHYLATED-DNA--PROTEIN-CYSTEINE METHYLTRANSFERASE OGT (6-O-methylguanine-DNA methyltransferase) (O-6-methylguanine-DNA-alkyltransferase)	Rv1316c	CAA98103.1	I6	14.4711	15.0265	1.46958		18.348	17.8564	17.8785	17.4122	18.7725	18.0763	17.5926	18.8529	18.734	17.9259	18.6483	18.0647	18.3353	18.2665	18.818	3
PROBABLE ATP-DEPENDENT CLP PROTEASE ATP-BINDING SUBUNIT CLPX	Rv2457c	CAA16034.1	C10	18.3405	18.8958	1.46948		15.1743	15.7498	15.6388	15.6931	15.9051	16.4305	15.4796	16.2953	16.2257	15.9342	16.7561	16.7335	16.1444	16.1436	16.1244	2
CONSERVED HYPOTHETICAL PROTEIN	Rv0825c	CAA17631.1	M4	15.2778	15.8137	1.44978		16.9979	16.7615	17.1781	17.0649	15.7439	17.1246	17.0241	17.5902	17.7221	17.4442	17.9923	17.8055	17.6475	16.8842	17.6616	3
POSSIBLE TWO COMPONENT SYSTEM RESPONSE TRANSCRIPTIONAL POSITIVE REGULATOR PHOP	Rv0757	CAB02400.1	H4	15.6229	16.158	1.44905		16.1037	16.2095	17.7815	17.8903	15.8891	17.7622	16.9699	18.0702	17.3557	16.9762	17.315	17.1218	17.8361	17.6077	17.8047	2
PROBABLE DNA PRIMASE DNAG	Rv2343c	CAB06159.1	N9	15.9405	16.4574	1.43084		15.8296	15.9486	15.9692	15.9618	16.0275	15.7918	16.0552	16.2362	16.5758	16.2731	16.5032	16.3895	16.3978	16.561	16.7226	4
PROBABLE ATP SYNTHASE GAMMA CHAIN ATPG	Rv1309	CAA97742.1	F6	19.053	19.5669	1.42793		18.4445	18.6709	20.1077	18.6968	21.1995	16.4604	18.2856	17.0858	20.4853	20.0599	21.0057	21.6285	19.6009	19.7961	19.9928	2
NADH-DEPENDENT ENOYL-[ACYL-CARRIER-PROTEIN] REDUCTASE INHA (NADH-DEPENDENT ENOYL-ACP REDUCTASE)	Rv1484	CAB02034.1	D7	18.0589	18.5725	1.42757		15.4839	15.4544	16.1389	15.4636	14.1347			16.1684	15.8953	16.0638	16.1674	15.4663	15.7824	15.7048		2
PROBABLE ACYL-CoA DEHYDROGENASE FADE10	Rv0873	CAA17679.1	A5	17.8814	18.3809	1.41375		14.2414	15.3712		13.7672	14.2583	13.8367	15.3516		15.0769	15.4667	14.3816	15.1772	14.9034	15.153		2
HYPOTHETICAL PROTEIN	Rv1154c	CAB09013.1	H5	15.5178	16.0057	1.40245		18.4907	18.7839	18.3294	18.9624	18.1995	17.1884	18.4293	19.535	18.7538	18.7195	18.8801	18.6271	18.8527	18.8385	18.9599	3
Probable haloalkane dehalogenase	Rv2296	CAB00975.1	J9	17.2753	17.7449	1.38473		16.0173	15.2251	15.5369	14.8033	13.5962	16.0365	15.7297	16.2726	15.9095	15.8062	15.4643	15.3225	15.8639	15.5921	16.2782	3
PROBABLE SHORT-CHAIN TYPE DEHYDROGENASE/REDUCTASE	Rv2509	CAB08927.1	I10	17.9909	18.4557	1.38009		18.6977	19.1012	16.3804	17.9269		17.9528	18.2946	18.9054	18.7483	19.0016	18.6541	18.2904	17.5832	18.5234	18.8734	2
HYPOTHETICAL PROTEIN	Rv1762c	CAB09325.1	A8	16.883	17.3476	1.38		16.6296	16.6537	16.8196	16.9497	16.0607	16.9908	16.6944	16.9673	17.2527	16.7405	17.0488	16.6014	16.3597	17.1406	17.1819	3
PROBABLE TRANSCRIPTIONAL REGULATORY PROTEIN	Rv0474	CAA17429.1	C3	15.7314	16.1921	1.37619		15.4368		15.5269		15.5896			16.1464	16.1385	15.795	16.0555	15.8028	16.5739	15.6657	15.8681	2
PROBABLE TRANSLATION INITIATION FACTOR IF-2 INFB	Rv2839c	CAB03670.1	M11	16.7576	17.2167	1.37462		19.6629	19.2162	19.1229	18.6848	19.6273	19.4939	19.2282	19.8165	19.5992	19.6375	19.698	19.6974	19.6831	19.876	19.9451	2
PROBABLE EXCINUCLEASE ABC (SUBUNIT A-DNA-BINDING ATPase) UVRA	Rv1638	CAB06633.1	I7	16.6633	17.1177	1.37024		18.8684	18.4861	18.7481	18.119	19.2371	18.7224	18.5841	18.9111	19.0493	18.8898	19.1656	19.1224	18.8928	19.0232	19.0334	3
RNA POLYMERASE SIGMA FACTOR SIGA (SIGMA-A)	Rv2703	CAB09463.1	C11	19.2909	19.7441	1.36906		17.0697	16.9454	17.0103	17.2314	16.4279	17.4135	16.4722	17.8199	17.1266	17.1137	17.3979	17.1768	16.9606	16.9113	17.4704	2
PROBABLE GLYCEROL-3-PHOSPHATE DEHYDROGENASE [NAD(P)+] GPDA1 (NAD(P)H-DEPENDENT GLYCEROL-3-PHOSPHATE DEHYDROGENASE) (NAD(P)H-DEPENDENT DIHYDROXYACETONE-PHOSPHATE REDUCTASE)	Rv0564c	CAA17435.1	H3	14.987	15.4392	1.36814		15.3299	16.3474	15.4071	15.9325	15.9429	15.455	15.7047	15.7225	16.4363	16.3883	16.8881		15.9538	15.8851	16.0702	2
Possible long-chain acyl-CoA synthase	Rv1683	CAB10940.1	K7	17.808	18.2597	1.36759		15.0222		17.9397	17.8791	15.3361	16.7938	17.575			18.1266	17.1146	17.087		16.8309	16.9243	3
CONSERVED HYPOTHETICAL ALANINE AND ARGININE RICH PROTEIN	Rv2731	CAB10907.1	G11	16.5609	17.0097	1.36493		16.9054	17.0347	16.1343	16.4764	16.661	16.6864	16.7448	17.53	17.4803	16.8096	17.099	17.1023	17.0517	17.0332	16.8355	2
MYCOLIC ACID SYNTHASE PCAA (CYCLOPROPANE SYNTHASE)	Rv0470c	CAE55286.1	B3	18.8376	19.281	1.35985		16.3331	16.6396	16.5875	16.518	16.1989	16.542	17.1071	16.9572	17.0391	17.3257	16.808	16.6451	16.9668	17.1662	17.1695	2
PROBABLE TRANSCRIPTIONAL REGULATORY PROTEIN	Rv1404	CAB02183.1	K6	13.3329	13.7742	1.35786			13.1013	13.3718	13.0938		13.7645		13.7036	13.5609	14.3268	14.2607	14.047	13.8622	13.713	12.7193	2
PROBABLE TRANSCRIPTIONAL REGULATORY PROTEIN EMBR	Rv1267c	CAB00888.1	O5	18.2994	18.74	1.35717		19.1861	19.5062	18.5606	19.282	19.5856	18.9947	19.0359	19.3073	19.7185	19.5732	19.7331	19.779	19.4716	19.3007	19.1409	4
CONSERVED HYPOTHETICAL PROTEIN	Rv3269	CAB07088.1	N12	16.5156	16.9415	1.3434		16.433	16.1432	16.0268	16.0669	17.3283	17.1447	16.466	17.0252	16.7067	17.1248	16.8154	16.8766	17.2378	16.8643	16.8809	2
CONSERVED HYPOTHETICAL PROTEIN	Rv2285	CAB00983.1	I9	15.6856	16.1058	1.33813		20.8683	20.9272	20.555	21.1216	20.6462	20.6702	20.3028	21.0429	21.2166	20.5372	22.0988	20.6315	21.1559	21.2651	21.1361	12
PROBABLE TRANSCRIPTION TERMINATION FACTOR RHO HOMOLOG	Rv1297	CAA97730.1	B6	17.8869	18.3043	1.33549		15.7455	15.6685	16.5692	15.7557	15.2606	15.7008	15.0985	16.587	16.1488	16.0631	16.1968	16.2388	15.9314	15.8821	15.7982	2
POSSIBLE TRANSMEMBRANE PHOSPHOLIPID BIOSYNTHESIS BIFUNCTIONNAL ENZYME PLSC: PUTATIVE L-3-PHOSPHOSERINE PHOSPHATASE (O-PHOSPHOSERINE PHOSPHOHYDROLASE) (PSP) (PSPASE) + 1-ACYL-SN-GLYCEROL-3-PHOSPHATE ACYLTRANSFERASE (1-AGP ACYLTRANSFERASE) (1-AGPAT) (LYSOPH	Rv2483c	CAA16060.1	E10	17.1794	17.595	1.33392		17.2651	16.8218	17.3315	16.9081	16.9247	17.5867	17.4177	17.6803	17.8342		17.4593	17.5524	17.6633	17.4258	17.5499	2
PROBABLE ACETYL-/PROPIONYL-COENZYME A CARBOXYLASE ALPHA CHAIN (ALPHA SUBUNIT) ACCA1: BIOTIN CARBOXYLASE + BIOTIN CARBOXYL CARRIER PROTEIN (BCCP)	Rv2501c	CAB08919.1	G10	20.7273	21.1355	1.32699				17.5652	16.6463	18.29	16.4165	15.8748	15.8495	16.5612	18.5151		18.4311	17.8992	17.9245		2
POSSIBLE CONSERVED SECRETED PROTEIN	Rv0383c	CAA17389.1	G2	15.7947	16.2011	1.32538		19.3729	18.5959	18.6005	18.9574	20.0132	19.2962	18.5347	19.4982	19.4041	19.1826	19.969	19.7919	19.4386	19.6877	19.563	3
PHOSPHOTYROSINE PROTEIN PHOSPHATASE PTPB (PROTEIN-TYROSINE-PHOSPHATASE) (PTPase)	Rv0153c	CAB07057.1	H1	17.2743	17.6751	1.32024		17.9407	18.6357	17.7919	18.5045	17.8899	18.1015	17.9905	18.3302	18.3583	18.3476	18.2929	18.217	18.2423	18.45	18.4624	2
PROBABLE CONSERVED TRANSMEMBRANE PROTEIN	Rv2206	CAA94249.2	D9	15.3068	15.6977	1.31119		16.5383	15.4205	15.9628	15.3725	15.6847	15.6871	15.8972	15.7511	16.3137	16.0713	16.2347	16.3727	16.4099	16.0364	16.4193	3
PROBABLE SHORT-CHAIN TYPE DEHYDROGENASE	Rv1865c	CAB06122.1	D8	16.6574	17.0469	1.30994		17.4505	17.1541	17.5742	16.4293	17.6336	17.5704	17.1076	17.4346	17.8764	17.5932	17.9334	17.5754	17.9791	17.1232	17.8851	2
3-OXOACYL-[ACYL-CARRIER PROTEIN] SYNTHASE 1 KASA (BETA-KETOACYL-ACP SYNTHASE) (KAS I)	Rv2245	CAA94641.1	F9	20.5755	20.9552	1.30112		18.5424	18.6375	18.317	18.1111	17.8804	18.3693	18.2383	18.4556	18.6799	18.821	18.7618	19.1278	18.4006	18.9167	18.7567	2
PROBABLE GLUTAMATE-1-SEMIALDEHYDE 2,1-AMINOMUTASE HEML (GSA) (GLUTAMATE-1-SEMIALDEHYDE AMINOTRANSFERASE) (GSA-AT)	Rv0524	CAB08991.1	F3	17.1132	17.4849	1.29393		18.712	18.2741	18.5724	17.9947	18.8726	18.7139	17.1816		18.473	18.1515	18.6716	18.3518	18.7324	18.4613	18.6692	3
PROBABLE ATP-DEPENDENT PROTEASE ATP-BINDING SUBUNIT CLPC1	Rv3596c	CAE55620.1	E13	17.3333	17.705	1.29386		17.2482	17.9932	16.8394	17.7673	17.5359	17.7259	17.1821	17.9716	17.4632	17.3937	17.8751	18.1018	17.6247	17.7624	17.6404	5
POSSIBLE TRANSFERASE	Rv3034c	CAA16119.1	D12	16.3109	16.6566	1.27076		15.6787	15.6337	14.9601	15.0852	15.215	14.5379	16.0369	15.8509	16.433	15.8897	16.0109	16.0129	14.6284	14.8329	15.9227	4
PROBABLE GLUTAMYL-TRNA SYNTHETASE GLTS (GLUTAMATE--TRNA LIGASE) (GLUTAMYL-TRNA SYNTHASE) (GLURS)	Rv2992c	CAE55534.1	C12	18.702	19.0454	1.26878		16.4197	15.9915	16.5053	16.3287	17.4147	16.9117	17.0302	17.4336	17.1094	16.842	17.6047	17.3582	17.3192	17.5221	15.186	3
CONSERVED HYPOTHETICAL PROTEIN	Rv0523c	CAB08990.1	E3	19.1645	19.503	1.2645		19.3531	18.203	20.2154	19.6667	18.603	19.3395	19.2108	20.9014	18.0994	19.6214	18.8951	19.2237	20.6452	18.0799	20.629	2
PROBABLE DNA HELICASE ERCC3	Rv0861c	CAA17667.1	O4	16.5364	16.871	1.26097		18.072	18.4469	18.6639	18.3887	18.7324	18.2856	18.5086	18.8189	18.9431	18.744	19.0332	19.2205	17.7932	17.8324	18.3176	5
PROBABLE ACYL-CoA DEHYDROGENASE FADE24	Rv3139	CAB06276.1	J12	18.6808	19.011	1.25719		16.8994	17.1181	16.4402	17.0638	16.6845	16.8647	17.1103	16.8974	17.3287	17.4299	17.7952	17.3197	17.3587	17.3471	17.3044	2
PROBABLE FATTY-ACID-CoA LIGASE FADD5 (FATTY-ACID-CoA SYNTHETASE) (FATTY-ACID-CoA SYNTHASE)	Rv0166	CAB09749.1	I1	15.619	15.9288	1.23954		17.5453	16.7091	17.3884	16.9318	17.9619	17.457	17.3395	17.4923	17.1489	17.5617	18.0835	18.4056	17.4797	17.7721	17.6959	6
Conserved hypothetical protein Acg	Rv2032	CAA17246.1	M8	16.9386	17.2471	1.23844		15.9671	16.7109	16.5378	16.5997	16.4246	16.6094	16.9056	16.9163	17.0007	17.1239	16.7664	17.0331	16.5559	17.1853	16.3862	7
Probable long-chain-fatty-acid-CoA ligase fadD15 (FATTY-ACID-CoA SYNTHETASE) (FATTY-ACID-CoA SYNTHASE)	Rv2187	CAA17491.1	B9	18.8393	19.1376	1.22969		15.1808	15.777	15	15.0744	15.6016	15.506	15.9368	15.6942	15.5637	16.2311	15.2873	15.7812	15.2949	16.0383	15.3443	4
PROBABLE ACYL-CoA DEHYDROGENASE FADE4	Rv0231	CAB06998.1	O1	20.0346	20.3328	1.22959		16.5459	14.387	17.0266	17.1372	15.3363	17.0769	16.6667	16.5422	16.4524	16.1987	16.4704	16.9565	16.8065	16.7445	17.0819	2
PROBABLE GTP-BINDING PROTEIN ENGA	Rv1713	CAB10970.1	L7	14.6941	14.9861	1.22434		18.8011	18.8178	18.6081	18.3001	18.9828			19.2904	19.2441	18.6787	18.829	18.89	19.1578	18.9825	19.291	2
ALKYL HYDROPEROXIDE REDUCTASE D PROTEIN AHPD (ALKYL HYDROPEROXIDASE D)	Rv2429	CAB03767.1	A10	16.466	16.757	1.22351		16.3051	16.161	15.6532	16.4505	16.0229	16.1261	17.3723	16.3778	16.4021	16.7861	16.5617	16.2822	15.9377	16.825	16.6922	7
DNA-DIRECTED RNA POLYMERASE (BETA CHAIN) RPOB (TRANSCRIPTASE BETA CHAIN) (RNA POLYMERASE BETA SUBUNIT)	Rv0667	CAB09390.1	M3	17.6606	17.9507	1.22271		17.2144	17.471	17.138	16.7127	17.4415	17	16.8145	17.3242	17.4473	17.2734	17.7193	17.4649	17.5889	17.5822	17.4791	3
PROBABLE ATP SYNTHASE ALPHA CHAIN ATPA	Rv1308	CAA97741.1	E6	19.2274	19.5119	1.21801		16.0044	16.9477	15.4586	15.456	15.0711	15.1082	15.2871	16.555	15.6005	16.6352	16.1511	15.3047	14.5594	16.4536	16.1711	3
POSSIBLE ESTERASE LIPW	Rv0217c	CAB07012.1	N1	14.4484	14.7295	1.2151		20.7546	17.9657	20.4468	20.0599	19.7262	20.0349	19.3883	20.6171	19.8332	19.0947	18.9509	19.0799	20.4299	20.2589	21.119	3
POSSIBLE CONSERVED TRANSMEMBRANE PROTEIN	Rv0513	CAB10750.1	D3	16.3906	16.6713	1.21475		14.7234	14.2644		14.8447	14.8574	15.5809	15.651	15.2922	15.642	14.2721	15.8772	15.7501	15.7401	15.6589	15.2808	4
PROBABLE ACYL-CoA DEHYDROGENASE FADE1	Rv0131c	CAB07037.1	G1	15.6545	15.9339	1.21366		18.663	18.505	18.5887	18.6076	18.2514	18.2724	17.5705	18.9599	18.6108	18.26	18.3898	18.6318	18.5731	18.2694	18.689	5
60 KDA CHAPERONIN 1 GROEL1 (PROTEIN CPN60-1) (GROEL PROTEIN 1)	Rv3417c	CAB01006.1	B13	18.7967	19.0624	1.20225		14.0787	14.8359	14.7483	14.9138	14.7933	14.9451	14.5435	14.9493	15.0628	15.1435	14.4899	15.3233	14.6828	15.1008	15.1363	2
PROBABLE CONSERVED TRANSMEMBRANE ATP-BINDING PROTEIN ABC TRANSPORTER	Rv1747	CAB09333.1	N7	17.4703	17.7291	1.19651		15.4296	16.6729	16.5437	16.6952	17.527	16.693	15.7008	16.7555	17.0574	17.5316	16.3367	16.8485	17.3392	16.1958	15.9915	2
POSSIBLE HYDROLASE	Rv2715	CAB09475.1	E11	16.1432	16.3994	1.19431		21.0309	20.1049	20.696	19.7416	21.4855	20.9766	19.9926	21.4924	21.3174	20.9882	21.1488	20.923	20.6843	20.6872	20.4004	4
PROBABLE CHROMOSOME PARTITION PROTEIN SMC	Rv2922c	CAA98982.2	O11	14.2137	14.4505	1.17839		18.9755	18.8449	19.0421	18.6596	19.2362	19.1528	18.8623	18.8623	19.1541	19.3836	19.334	19.4044	19.5444	18.6686	19.1187	7
PROBABLE PHOSPHATE-TRANSPORT ATP-BINDING PROTEIN ABC TRANSPORTER PHOT	Rv0820	CAA17626.1	J4	16.1549	16.3861	1.17381		14.4213		14.2621	14.23	14.1979	15.1308				14.4078	14.4981	15.143	15.3397		14.259	2
PROBABLE MEMBRANE NADH DEHYDROGENASE NDHA	Rv0392c	CAB06598.1	H2	16.6855	16.9116	1.16969		16.7054	15.5216	16.4071	15.6614	17.3456	16.5239	16.5695	15.2105		17.2294		16.9096	16.7367	16.9118	17.0298	2
POSSIBLE METHYLTRANSFERASE (METHYLASE)	Rv2622	CAB08620.1	N10	16.3793	16.6033	1.16797		15.5375	15.6459	15.8127	15.8995	14.9589	15.6399	16.0872	16.1342		15.8013	15.6549	15.2177	16.2895	16.2255	16.2142	2
PROBABLE 3-HYDROXYBUTYRYL-CoA DEHYDROGENASE FADB2 (BETA-HYDROXYBUTYRYL-CoA DEHYDROGENASE) (BHBD)	Rv0468	CAA17423.1	A3	16.4875	16.7076	1.16483		15.6063	16.0753	16.1679	16.3389	16.0434	16.2693	16.5014	16.4519	16.4565	16.9348	16.9538	16.7804	15.2993	16.5886	15.7299	3
PROBABLE CHAPERONE PROTEIN HTPG (HEAT SHOCK PROTEIN) (HSP90 FAMILY PROTEIN) (HIGH TEMPERATURE PROTEIN G)	Rv2299c	CAB00972.1	L9	18.4672	18.6871	1.16462		16.8419	16.8654	17.2176	16.3855	16.6898	16.4927	17.1601	17.1429	16.7045	17.0503	16.6726	16.9501	17.2797	17.1462	16.5051	2
POSSIBLE TRANSCRIPTIONAL REGULATORY PROTEIN (PROBABLY MARR-FAMILY)	Rv0042c	CAB02521.1	D1	17.3449	17.5637	1.16376		14.2293	13.8598	13.9218	13.8445	14.7985	14.6519	14.1902	14.929	14.4124	14.6162	14.7263	14.3281	14.2158	14.7297	13.6466	5
CONSERVED HYPOTHETICAL PROTEIN	Rv2342	CAB06162.1	M9	17.4869	17.7035	1.16199		16.4031	16.121	16.4995	15.7047	15.7375	16.3694	16.2496	15.9687	16.4772	16.3549	16.8298	15.9219	16.5196	16.4172	16.5997	4
PROBABLE 2-OXOGLUTARATE DEHYDROGENASE SUCA (Alpha-ketoglutarate dehydrogenase)	Rv1248c	CAA15904.1	M5	18.9676	19.1838	1.16163		16.7869	15.7314	18.6195	15.5784	15.9423	16.7561	15.9976	17.1595	17.3373	16.7129			15.5146	16.7779	16.7433	3
PROBABLE FATTY-ACID-CoA LIGASE FADD30 (FATTY-ACID-CoA SYNTHETASE) (FATTY-ACID-CoA SYNTHASE)	Rv0404	CAB06604.1	I2	18.1221	18.3376	1.1611		17.2424	16.9162	17.5109	17.1752	17.5223	17.6422	17.4054	17.1184	17.4143	17.954	17.854		17.5101	17.9352	17.16	2
PROBABLE CONSERVED MCE ASSOCIATED MEMBRANE PROTEIN	Rv0178	CAB09745.1	J1	15.4395	15.6544	1.1606		17.4522	18.1958	17.1715	18.1865	17.8052	17.7683	17.0449	18.1222	17.8918	17.7161	18.099	18.1448	17.7817	17.9019	17.948	4
Probable oxidoreductase	Rv2129c	CAB10712.1	O8	18.3232	18.5258	1.15079		17.0195	17.6521	17.2386	17.5583	18.277	16.9005	17.7621	17.6934	18.3351	18.1188	17.5569	17.5535	17.1674	17.8735	17.3292	2
PROBABLE SUCCINATE DEHYDROGENASE [IRON-SULFUR SUBUNIT] (SUCCINIC DEHYDROGENASE)	Rv0247c	CAA17339.1	C2	18.3512	18.548	1.14609			19.166	19.8313	19.1299	20.8642	20.0858	18.8674	20.3918	17.4557	19.8553	19.8858	19.716	20.4782	20.1542	17.0676	2
PROBABLE ACYL-CoA DEHYDROGENASE FADE15	Rv1467c	CAA15996.1	A7	18.912	19.1064	1.14429		16.4713	17.2096	17.6664	17.5713	17.6186	17.4542	17.6632	17.7915	16.8277	17.5778	17.5376	17.5221	17.6558	17.6828	17.8032	2
PROBABLE HELICASE	Rv3649	CAB08839.1	G13	16.2987	16.4831	1.13633		17.3692	17.5889	17.2702	17.8819	17.2348	17.4914	15.7765	17.5028	17.4053	16.8999	17.1509	17.5451	17.6255	17.3487	17.7073	2
HYPOTHETICAL PROTEIN	Rv2824c	CAB03662.1	L11	17.264	17.4463	1.13476		18.8456	18.241	18.463	18.1417	18.6925	17.9613	18.1488	18.112	18.4315	18.5864	18.9055	18.5216	18.0616	18.3873	18.3631	5
PROBABLE ISOCITRATE LYASE aceAa [FIRST PART] (ISOCITRASE) (ISOCITRATASE) (ICL)	Rv1915	CAB10027.1	H8	17.3793	17.5498	1.12551		17.1798	17.2891	17.0545	17.1284	16.9155	17.1339	17.5889	16.6956	17.3118	17.4794	17.1346	17.451	17.9622	17.614	17.144	2
PROBABLE 30S RIBOSOMAL PROTEIN S4 RPSD	Rv3458c	CAB08724.1	C13	18.3316	18.5016	1.12501		16.091	16.0001	15.6846	15.9668	15.3207	15.8369	16.2469	15.5327		17.1939		16.023		16.1598	15.2877	2
PROBABLE CONSERVED ATP-BINDING PROTEIN ABC TRANSPORTER	Rv1463	CAA15993.1	O6	17.2304	17.3982	1.12332		16.5664	17.9108	16.6623	17.8333	17.0978	17.2787	17.4213		17.1334	16.9851	17.2348	17.8559	17.4702	17.1837	17.4147	3
PROBABLE CONSERVED TRANSMEMBRANE PROTEIN	Rv3669	CAA17991.1	I13	17.1843	17.3491	1.121		18.6829	18.499	19.52	18.7789	19.2555	18.8777	18.3613	19.0662	19.4981	19.359	20.1944	19.9705	17.83	18.0366	17.5912	4
PROBABLE 30S RIBOSOMAL PROTEIN S3 RPSC	Rv0707	CAB06470.1	E4	18.6718	18.8359	1.12045		18.245	18.8994	18.3208	19.2089	17.8556	18.8285	17.9121	19.1592	18.5824	18.5956	18.6439	18.5283	18.7517	18.8087	18.4268	7
CONSERVED HYPOTHETICAL PROTEIN	Rv0421c	CAB06561.1	K2	15.8782	16.0394	1.11827		17.3087	19.5894	18.1623	19.254	19.0341	19.3423	19.1844	19.1564	19.2607	18.6892	19.1895	19.2394	19.1647	19.2203	19.1809	3
HEAT SHOCK PROTEIN HSPX (ALPHA-CRSTALLIN HOMOLOG) (14 kDa ANTIGEN) (HSP16.3)	Rv2031c	CAA17245.1	L8	19.7681	19.9229	1.11333		18.4021		17.1713		18.0587					18.0772		17.6375	18.0056	17.8989	18.477	2
PROBABLE 30S RIBOSOMAL PROTEIN S5 RPSE	Rv0721	CAB06445.1	G4	20.4334	20.5848	1.11072		19.9233	20.1647	20.0606	20.0221	20.0592	20.4592	19.1201	20.269	19.6743	19.6487	19.4321	19.7549	20.4396	20.1515	19.9481	2
ACETYL/PROPIONYL-CoA CARBOXYLASE (BETA SUBUNIT) ACCD6	Rv2247	CAA94668.1	H9	18.4426	18.5879	1.10594		17.5463	17.3307	17.1306	17.1108	17.749	17.2508	17.4311	17.1468		16.217	17.8046	17.8666	18.2689	17.5898	17.0272	3
PROBABLE OXIDOREDUCTASE (ALPHA SUBUNIT)	Rv2455c	CAA16032.1	B10	17.8774	18.0193	1.10333		17.7972	17.5972	17.6643	17.2985	16.0834	17.4241	17.0998	17.8211	17.4647	16.9386	16.9916	16.8768	17.7617	17.5655	17.7505	2
HYPOTHETICAL PROTEIN	Rv0079	CAA16260.1	E1	16.8734	16.9994	1.09124		19.4178	18.685	16.4882	19.0556	19.7092	18.3735	18.9735	19.0684	19.6759	19.1385	18.3656	17.9901	18.8368	19.4637	18.1481	4
PROBABLE DEHYDROGENASE/REDUCTASE	Rv0439c	CAA17396.1	M2	16.8076	16.9314	1.08963		16.0875	16.2813	16.2287	17.1569	16.5997	15.6671	16.6339	15.8243	17.1963	17.0189	15.9338	17.1267	16.4742	16.9293	16.3229	2
PROBABLE ATP SYNTHASE A CHAIN ATPB (PROTEIN 6)	Rv1304	CAA97737.1	C6	17.2807	17.3963	1.08348		15.6119	17.0884	15.9696	16.562	15.7111	16.2875	16.6426	15.8686	16.7501	16.7529	17.0847	17.3014	16.0848	15.4431	15.7432	2
PROBABLE FATTY-ACID-CoA LIGASE FADD4 (FATTY-ACID-CoA SYNTHETASE) (FATTY-ACID-CoA SYNTHASE)	Rv0214	CAB07009.1	M1	16.2676	16.3786	1.07999		17.429	17.3124	17.6008	17.5311	17.2256	17.6661	17.7602	17.2495	17.7372	17.4119	17.8095	17.5032	17.8219	17.3392	18.0362	3
PROBABLE MONOOXYGENASE	Rv3049c	CAA16134.1	F12	17.5036	17.6136	1.07922		15.6745	16.3103	16.1898	16.8947	15.6729	16.1854	16.1244	15.6888	15.9593	16.4778	16.9549	16.7969	15.1992	15.8965	15.3584	2
Probable Ubiquinol-cytochrome C reductase QcrB (cytochrome B subunit)	Rv2196	CAA94265.1	C9	19.5362	19.6321	1.06875		17.951		17.708	17.9932	18.2778	18.1767	17.85		17.2576	17.1827	18.5061	18.7863	17.7607	18.1916	17.5874	3
POSSIBLE IRON-REGULATED SHORT-CHAIN DEHYDROGENASE/REDUCTASE	Rv3224	CAB08313.1	L12	18.8536	18.9433	1.0641		17.6377	18.968	18.3755	19.1974	18.919	19.5248	18.9545			19.778	19.4508	19.3213	18.6059	18.4968	18.7219	5
PROBABLE GTP PYROPHOSPHOKINASE RELA (ATP:GTP 3'-PYROPHOSPHOTRANSFERASE) (PPGPP SYNTHETASE I) ((P)PPGPP SYNTHETASE) (GTP DIPHOSPHOKINASE)	Rv2583c	CAB01260.1	K10	17.2529	17.3254	1.05151		18.9107	19.0382	18.8794	19.3083	18.8581	19.2133	17.7889	18.8402	18.2138	18.1742	18.2607	18.3132	19.092	18.9059	19.2472	4
PROBABLE SHORT-CHAIN TYPE DEHYDROGENASE/REDUCTASE	Rv1245c	CAA15901.1	L5	18.3563	18.4211	1.04598		17.009	16.9957	17.3412	18.3733	17.1694	16.5188	17.4403	17.4179	16.9018	17.5015	17.434	17.7955	17.4224	17.7738	17.3239	4
CONSERVED HYPOTHETICAL PROTEIN	Rv0464c	CAA17419.1	O2	17.9893	18.0441	1.03869		18.4116	15.7592	18.3613	19.2782	17.3596	17.7264	19.0288	18.1175	18.0071	18.7841	17.46	17.474	18.5329	17.9329		2
BIFUNCTIONAL UDP-GALACTOFURANOSYL TRANSFERASE GLFT	Rv3808c	CAA17872.1	K13	17.3642	17.4173	1.03748		17.6413	17.7955	17.6796	17.6615	17.451	18.1298	17.2443	17.7993	17.8429	17.6561	17.5524	17.4614	17.638	17.6973	17.9907	3
PHOSPHATE-TRANSPORT ATP-BINDING PROTEIN ABC TRANSPORTER PSTB	Rv0933	CAB08485.1	D5	17.6576	17.7048	1.03327		21.696		21.5202		22.0275			21.2486		21.1584	21.8639	21.8156	22.1661	21.9253	21.6609	2
DNA-DIRECTED RNA POLYMERASE (BETA' CHAIN) RPOC (TRANSCRIPTASE BETA' CHAIN) (RNA POLYMERASE BETA' SUBUNIT).	Rv0668	CAB09389.1	N3	19.3252	19.3604	1.02468		19.1245	19.8218	18.9192	19.4595	19.3241	19.4729	19.1541	19.9135	19.6748	19.2269	19.1667	19.5214	18.3562	19.3996	19.6237	4
3-OXOACYL-[ACYL-CARRIER PROTEIN] SYNTHASE 2 KASB (BETA-KETOACYL-ACP SYNTHASE) (KAS I)	Rv2246	CAA94642.1	G9	17.3222	17.3522	1.02097		20.0813	20.8245	19.9618	20.762	19.1346	19.3553	20.1229	20.7364	20.4906	19.6922	20.0809	20.5003	20.5365	20.5091	20.1164	4
CONSERVED HYPOTHETICAL PROTEIN	Rv1978	CAA17851.1	K8	17.1029	17.1322	1.02051		17.6431	17.7233	17.0605		17.7251		16.4591		17.8976	16.4289	17.6005	17.5807	17.3124	17.1798	17.4653	4
POSSIBLE TRANSCRIPTIONAL REGULATORY PROTEIN	Rv0823c	CAA17629.1	K4	16.4177	16.4436	1.0181		17.111	17.2734	17.134	17.2969	16.4949	17.4813	16.9287	17.7944	16.3912	17.1758	16.8774	16.7204	17.3705	17.34	17.3877	3
PROBABLE NADP-DEPENDENT ALCOHOL DEHYDROGENASE ADHC	Rv3045	CAA16130.1	E12	19.1557	19.181	1.0177		16.4083	16.5671	16.0659	16.7049	16.0439	16.5437	16.5902	15.8849	16.5532	16.6746	16.2665	16.307	16.5049	16.5337	16.8239	2
PROBABLE IRON-REGULATED ELONGATION FACTOR TU TUF (EF-TU)	Rv0685	CAB06471.1	B4	18.9249	18.9273	1.00169		18.3623	18.8584	18.2759	18.3958	18.4765	17.9132	17.9802	18.6988	18.4792	18.3329	18.7261	18.1142	18.4882	18.7283	18.6386	6
PROBABLE PROTEIN-EXPORT MEMBRANE PROTEIN SECF	Rv2586c	CAB01257.1	L10	17.3586	17.3229	0.975602		18.6443	18.9062	19.4371	18.8262	18.7581	19.25	18.6522	19.8014	18.6952	19.2091	18.6329	18.5264	19.3404	19.3317	17.8813	4
PROBABLE DEHYDROGENASE/REDUCTASE	Rv0769	CAB02381.1	I4	18.1512	18.1125	0.97353		18.8327	19.5042	18.8143	19.2726	19.0465	18.6023	18.3113	19.4761	19.1577	18.6832	19.3138	19.0582	18.9191	19.117	19.1265	3
POSSIBLE SOJ/PARA-RELATED PROTEIN	Rv3213c	CAB08303.1	K12	15.4573	15.4066	0.965483		18.2513	17.6048	18.092	18.0256	17.7983	16.3014	18.2896	18.0006	17.7862	17.8718	16.7029	16.7409	18.0699	17.7764	18.5596	5
PROBABLE OXIDOREDUCTASE	Rv1751	CAB09317.1	O7	19.5569	19.5023	0.962842		17.2496	17.9397	17.3953	17.7955	16.9757	17.3981	17.2259	15.9587	15.498	17.6493	17.1695	17.9084	18.0735	18.1548	17.7133	3
PROBABLE DNA-BINDING PROTEIN HU HOMOLOG HUPB (HISTONE-LIKE PROTEIN) (HLP) (21-KDA LAMININ-2-BINDING PROTEIN)	Rv2986c	CAB05427.1	B12	21.7479	21.6912	0.961498		20.2643	20.3445	20.3599	20.3972	20.8987	20.3162	20.4527	20.2909	21.0126	20.264	21.0946	20.7216	20.7404	20.6618	19.893	5
HYPOTHETICAL PROTEIN	Rv0088	CAA98924.1	F1	18.064	18.0073	0.961457		18.4224	18.755	17.6593	18.7456	17.8151	17.9165	17.7448	18.703	18.241			16.9993	18.2826	17.8306	18.6187	2
PROBABLE TRANSCRIPTIONAL REGULATORY PROTEIN MOXR1	Rv1479	CAE55395.1	B7	19.9727	19.9148	0.960603		20.6967	21.0783	21.1361	21.5798	21.4382	21.6394	20.334	19.9812	20.9039	20.777	20.2615	20.9886	21.2735	21.2139	21.1141	2
POSSIBLE EXPORTED CONSERVED PROTEIN	Rv1488	CAB02038.1	E7	16.0298	15.9634	0.955008		15.6239	15.718	15.3543	16.1542	14.3631	15.7675	15.2203	15.1178	15.261	16.0019	14.9458	15.8593		15.8822	14.7785	2
PROBABLE N UTILIZATION SUBSTANCE PROTEIN A NUSA	Rv2841c	CAB08449.1	N11	17.6583	17.5833	0.949346		19.1972	19.5968	19.7367	19.5487	19.1724	19.8906	19.7558	18.8825	19.6575	19.8504	19.4798	19.5952	19.5864	19.4362	19.53	2
PROBABLE FATTY-ACID-CoA LIGASE FADD34 (FATTY-ACID-CoA SYNTHETASE) (FATTY-ACID-CoA SYNTHASE)	Rv0035	CAE55235.1	C1	17.8177	17.7423	0.949096		18.2962	18.1641	18.4859	17.7757	17.4315	18.1651	18.1298	18.0299	17.5735	17.5957	18.1925	17.6064	18.3745	18.2848	18.4012	5
PROBABLE ACYL-[ACYL-CARRIER PROTEIN] DESATURASE DESA1 (ACYL-[ACP] DESATURASE) (STEAROYL-ACP DESATURASE) (PROTEIN DES)	Rv0824c	CAE55326.1	L4	17.7661	17.6885	0.947619		15.9719	16.1929	15.9935	16.5361	16.2616	16.0742	15.1782	16.1837	15.6567	15.7736	15.9951	15.9675	16.1065	16.0964	15.9273	3
CONSERVED HYPOTHETICAL PROTEIN	Rv2629	CAB08634.1	A11	17.0468	16.9541	0.937753		17.9764		16.3547		18.1631	17.9484	17.849	17.6149		18.1968	17.4532	17.6173	16.5404	18.1127	17.548	3
PROBABLE MEMBRANE PROTEIN	Rv1920	CAA17699.1	J8	17.9928	17.896	0.935131		17.6943		17.331		18.4277					15.7146		18.7289	18.1749	18.1391	17.9539	2
PROBABLE FATTY-ACID--CoA LIGASE FADD21 (FATTY-ACID-CoA SYNTHETASE) (FATTY-ACID-CoA SYNTHASE)	Rv1185c	CAA15862.1	I5	16.1503	16.0415	0.927355		19.3901	19.4434	19.5859	19.3272	19.2194	19.7214	20.0657	19.8236	19.9702	19.8423	20.2681		17.6165	19.8372	20.0666	3
PROBABLE FATTY ACID SYNTHASE FAS (FATTY ACID SYNTHETASE)	Rv2524c	CAB06201.1	J10	17.0402	16.9188	0.919272				16.7991	16.9445			16.8768			18.1682	15.8306					2
DNA GYRASE (SUBUNIT B) GYRB (DNA TOPOISOMERASE (ATP-HYDROLYSING)) (DNA TOPOISOMERASE II) (TYPE II DNA TOPOISOMERASE)	Rv0005	CAB02426.1	A1	17.8769	17.754	0.918373		16.9612	17.1176	17.1196	17.4735	16.9546	17.3632	16.292	17.3672	16.6715	16.7121	17.0866	16.4149	16.9886	16.8731	17.2365	4
CONSERVED HYPOTHETICAL PROTEIN	Rv1461	CAA15991.1	N6	15.5874	15.4566	0.913302		14.5914		15.1072	16.7328	15.1393	15.4304	16.5234	14.8406		16.9044	14.868	15.2133				2
PROBABLE TRANSLATION INITIATION FACTOR IF-1 INFA	Rv3462c	CAB08728.1	D13	18.8604	18.7285	0.912591		19.0056	19.3117	19.2957	19.2741	19.5796	19.4757	18.1477	19.3355	19.1261	19.0598	19.4538	19.2235	18.6679	19.0842	19.4973	2
POSSIBLE CONSERVED TRANSMEMBRANE TRANSPORT PROTEIN MMPL3	Rv0206c	CAA17328.1	K1	17.7583	17.6235	0.910814		18.5571		20.1439		17.8803			19.3977	19.0116	20.1816	18.5641	17.9805	17.7232	17.3136	19.6553	2
PROBABLE METHYLTRANSFERASE	Rv1498c	CAB02048.1	F7	17.597	17.4556	0.906652		17.2954	18.1041	16.455	18.0605	17.4664	17.0417	17.0869	17.2547	17.4079	17.3404	17.7003	17.6948	16.97	16.8894	17.326	3
60 KDA CHAPERONIN 2 GROEL2 (PROTEIN CPN60-2) (GROEL PROTEIN 2) (65 KDA ANTIGEN) (HEAT SHOCK PROTEIN 65) (CELL WALL PROTEIN A) (ANTIGEN A)	Rv0440	CAA17397.1	N2	21.0424	20.8931	0.901665		17.7619	17.8163	17.5066	18.0414	17.6822	17.6602	17.5007	17.6937	17.4505	16.6968	18.1157	18.2379	17.5575	16.2248	17.954	2
CONSERVED HYPOTHETICAL PROTEIN	Rv2751	CAA15547.1	I11	17.4257	17.2657	0.895018		16.3431	15.9122	15.9546	15.9561		16.5561	16.1215	16.2105	14.7314	16.1972			15.981	16.3064	16.4563	2
CONSERVED HYPOTHETICAL PROTEIN	Rv2054	CAA17268.1	N8	16.1406	15.9805	0.89494		14.6564	15.1858		15.3526	14.2871	15.7104	14.5906	14.4875	14.7514	15.1411	14.2997	14.7479	14.9653	14.9179	14.8731	2
POSSIBLE OXIDOREDUCTASE	Rv3368c	CAA15753.1	A13	16.539	16.3625	0.884865		17.0988	18.1099	17.6773	18.1672	17.8397	18.3599	17.8852	17.9305	18.1181	18.2825	18.2076	18.6693	15.6555	17.6797	17.4888	9
IRON-REGULATED CONSERVED HYPOTHETICAL PROTEIN TB15.3	Rv1636	CAB08889.1	H7	14.9638	14.773	0.876105			16.0557		16.6087		15.8631	14.7641	15.4228	15.3399	15.8323	15.2287	16.4061		15.8366	15.2934	2
PROBABLE POLYPRENYL-DIPHOSPHATE SYNTHASE GRCC1 (POLYPRENYL PYROPHOSPHATE SYNTHETASE)	Rv0562	CAB08957.1	G3	15.8229	15.6228	0.870518		16.6564	16.9503	16.5131	16.8299	16.7654	16.5338	17.3288	15.5714	16.5393	17.0587	16.7601	16.9612	16.9716	16.5449	16.1277	9
3-OXOACYL-[ACYL-CARRIER PROTEIN] REDUCTASE FABG1 (3-KETOACYL-ACYL CARRIER PROTEIN REDUCTASE) (MYCOLIC ACID BIOSYNTHESIS A PROTEIN)	Rv1483	CAB02033.1	C7	18.1378	17.9377	0.870498		20.6921	20.8597	20.6053	20.9877	20.7815	20.5916	19.6834	20.6006	20.3074	20.0322	20.2208	19.9364	20.5742	20.5225	20.7257	5
PROBABLE GTP-BINDING PROTEIN LEPA (GTP-BINDING ELONGATION FACTOR)	Rv2404c	CAB03723.1	O9	17.7099	17.4914	0.859446		17.3395	17.061	16.9534	18.2111	18.1005	17.8683	17.645	17.6855	17.1562	18.3849	18.4404	17.9429	16.4148	16.7128	16.9073	3
PROBABLE IRON-REGULATED PHOSPHOENOLPYRUVATE CARBOXYKINASE [GTP] PCKA (PHOSPHOENOLPYRUVATE CARBOXYLASE) (PEPCK)(PEP CARBOXYKINASE)	Rv0211	CAB07006.1	L1	18.8567	18.6309	0.855124		19.1612	18.8578	19.2268	18.5649	19.1282	19.2696	18.9126	19.0085	17.2188	19.2634	18.8595	18.6408	19.0644	18.9108	19.3154	2
DNA TOPOISOMERASE I TOPA (OMEGA-PROTEIN) (RELAXING ENZYME) (UNTWISTING ENZYME) (SWIVELASE) (TYPE I DNA TOPOISOMERASE) (NICKING-CLOSING ENZYME) (TOPO I)	Rv3646c	CAB08843.1	F13	16.7968	16.5669	0.852676		17.678	18.3792	18.3503	18.6736	18.3203	17.6148	17.948	17.9992	17.861	18.4254	17.9198	18.555	17.6383	17.165		2
CONSERVED HYPOTHETICAL PROTEIN	Rv1919c	CAA17698.1	I8	19.0173	18.7852	0.851402		15.0528	15.6607	15.8571	16.5826		15.7191	16.1559	15.3787	15.9416	16.3593	16.043	16.4966	14.2975	14.6157		2
PROBABLE ATP SYNTHASE BETA CHAIN ATPD	Rv1310	CAA97743.1	G6	20.6002	20.365	0.849565		17.3	17.7938	17.7569	17.6875	17.95	17.9476	17.8721	17.4135	17.6918	17.9428	18.3734	17.9821	17.2448	16.8431	17.4966	8
CONSERVED HYPOTHETICAL PROTEIN	Rv3091	CAB08383.1	G12	15.838	15.5903	0.842242		14.7105	15.5909	15.5005	15.7096	15.234	16.0591	14.569	15.1314		14.8007		15.3937	14.3957	14.9565	15.7213	3
PROBABLE 50S RIBOSOMAL PROTEIN L5 RPLE	Rv0716	CAB06440.1	F4	15.3391	15.0665	0.827861		16.1945	17.4244	17.1022	17.5797	16.246	17.2248	17.5559	17.545	16.1707	17.113	17.1039	17.1562	17.1149	17.2191	16.2098	3
PROBABLE PREPROTEIN TRANSLOCASE SECE1	Rv0638	CAE55308.1	J3	18.1949	17.9212	0.827189		16.4718	15.8179	17.821	17.8492	16.5084	16.8239	17.4104	15.4358	16.9746	18.1278	17.9537	17.665	15.5178	14.9214	16.7763	2
PROBABLE FATTY-ACID-CoA LIGASE FADD36 (FATTY-ACID-CoA SYNTHETASE) (FATTY-ACID-CoA SYNTHASE)	Rv1193	CAB07836.1	J5	19.6574	19.3756	0.822527		16.2264	15.2304	16.75	16.9924	16.6102	16.4382	17.5251		15.5942	17.2739	17.4065	17.1466	16.7193	15.498	14.899	2
PROBABLE 3-OXOACYL-[ACYL-CARRIER PROTEIN] REDUCTASE FABG4 (3-KETOACYL-ACYL CARRIER PROTEIN REDUCTASE)	Rv0242c	CAA17334.1	A2	16.9575	16.6716	0.820184		16.2912	17.7067		18.2997	16.5134	16.9911		16.7946	16.7141	16.8209	16.9573	17.1949	16.806	16.2865	16.7693	2
PROBABLE THIAMINE-PHOSPHATE PYROPHOSPHORYLASE THIE (TMP PYROPHOSPHORYLASE) (TMP-PPASE) (THIAMINE-PHOSPHATE SYNTHASE)	Rv0414c	CAB06584.1	J2	21.1289	20.8142	0.804009		16.9351	17.1077	16.5549	16.1921	16.4714	16.4255	16.5044	16.5471	16.2863	15.3549	16.8556	16.8396	16.0267	15.3468	16.2687	2
PROBABLE ENOYL-CoA HYDRATASE ECHA14 (ENOYL HYDRASE) (UNSATURATED ACYL-CoA HYDRATASE) (CROTONASE)	Rv2486	CAA16063.1	F10	17.1604	16.793	0.775144		17.281	16.9528	16.6994	17.1229	15.6235	17.0574	16.5332	16.2777	16.6997	16.8347	15.9004	16.6098	16.7962	16.2492	15.6939	6
CONSERVED 35 KDA ALANINE RICH PROTEIN	Rv2744c	CAE55517.1	H11	16.7529	16.3827	0.773702		20.8947	21.248	20.9618	20.8606	21.2926	20.801	21.2383	20.6255	20.8851	21.0748	21.2715	20.8499	20.9327	20.486	21.019	11
CONSERVED HYPOTHETICAL PROTEIN	Rv0282	CAA17357.1	D2	19.8075	19.4064	0.757283			17.1391		17.2752		17.0343	17.8811		16.199				17.5257	16.9071		2
PROBABLE DNA POLYMERASE I POLA	Rv1629	CAB08882.1	G7	16.3301	15.9258	0.75565		17.969		17.8294		18.8203		18.161			18.1232		18.2623	17.6989	17.6004		2
CONSERVED HYPOTHETICAL PROTEIN	Rv1875	CAB10051.1	F8	16.5987	16.1907	0.753669		15.1402	15.932	15.8422	16.4412	15.2534	15.884	16.0261	14.3843	15.9284	14.4624	16.7063	15.6996	14.8283	15.4591	14.5396	3
Possible haloalkane dehalogenase	Rv1833c	CAB01469.1	C8	17.829	17.4107	0.748336		15.7313	16.3374	16.3275	16.3795	16.4068	16.5322	16.5958	15.5857	15.9104	15.9453	16.1018	16.8153	15.7668	15.2045	16.0768	9
PROBABLE 30S RIBOSOMAL PROTEIN S12 RPSL	Rv0682	CAA17465.1	A4	17.3324	16.8773	0.729424		16.2821	16.6474	15.8938	16.7812	16.7924	16.511	16.9739	15.6947	16.3266	16.94	16.7841	16.9776	13.9902	14.7186	15.3926	2
CONSERVED MEMBRANE PROTEIN	Rv1132	CAB09043.1	G5	15.7884	15.251	0.689		17.3818	18.1975	17.9818	18.4533	16.6895	17.6693	18.4475	17.4949	17.3268	17.7364	17.4967	17.6004	16.3122	16.4964	17.0538	5
PROBABLE GLUTAMINE SYNTHETASE GLNA2 (GLUTAMINE SYNTHASE) (GS-II)	Rv2222c	CAA94645.1	E9	17.8315	17.1897	0.640901		16.6152	16.8255	16.7635	17.4916	15.872	16.8763	17.1249	16.0787	16.3658	15.3678	15.4927	16.5583	15.7673	16.3158	17.2554	4
CONSERVED HYPOTHETICAL PROTEIN	Rv2298	CAB00973.1	K9	16.7956	16.1502	0.639342		17.0548	17.9101	16.8976	18.8056	17.6611	17.7925	18.6811	15.8247	17.562	18.2306	18.9861	19.0852	16.3943	16.041	17.1621	2
POSSIBLE ACYL-CoA DEHYDROGENASE FADE16	Rv1679	CAA17610.1	J7	15.1245	14.4696	0.635106			13.77	15.2025	14.8963		15.3305	16.4231	13.3394	12.8033	15.4403	15.7547	16.4046		13.5436	14.001	2
POSSIBLE LIPID CARRIER PROTEIN OR KETO ACYL-COA THIOLASE	Rv0914c	CAB08512.1	B5	16.5545	15.8531	0.614944		19.6299	20.3909	19.6762	20.4057	19.4802	20.0583	19.0114	20.3633	19.8421	19.0769	18.2497	19.972	19.2013	18.3681	20.1781	6
CONSERVED HYPOTHETICAL PROTEIN	Rv1261c	CAB00892.1	N5	17.8175	17.0468	0.586148		17.3401	17.0671	17.2573	18.7819	16.3555	19.1418	18.7787	16.837	16.7708	17.1675	16.8011	16.7372	16.9276	17.4783	17.6552	2
PROBABLE BIFUNCTIONAL riboflavin biosynthesis protein RIBG : Diaminohydroxyphosphoribosylaminopyrimidine deaminase (Riboflavin-specific deaminase) + 5-amino-6-(5-phosphoribosylamino) uracil reductase (HTP reductase)	Rv1409	CAB02188.1	L6	17.8518	17.0806	0.585943		18.1283	18.4028	17.5728	17.7279	17.3882	17.4712	18.2713	15.2408	17.4123	17.3333	14.9842	17.8971	17.9733	17.6551	18.1488	4
Probable 3-deoxy-D-arabino-heptulosonate 7-phosphate synthase AroG (DAHP synthetase, phenylalanine-repressible)	Rv2178c	CAA17482.1	A9	16.7453	15.87	0.545139		16.198	17.0173	17.0315	17.0786		16.5117	16.6349	15.8279	15.5911	16.4895	15.9581	16.5312		15.1375	15.555	2
PROBABLE 30S RIBOSOMAL PROTEIN S15 RPSO	Rv2785c	CAA15580.1	J11	18.4205	17.2142	0.433395		17.9632	18.8231	18.3338	18.8818		18.3248	18.1961	17.9966	17.7825	14.2881	16.0642		17.9437	17.9797	18.4447	2
POSSIBLE L-LACTATE DEHYDROGENASE (CYTOCHROME) LLDD1	Rv0694	CAB06457.1	D4	17.7116	16.1799	0.345876		17.5369	17.2932	17.0718	18.4048	17.9851	17.3146	18.3748	15.0477	15.9641	16.5523	18.2193	17.4608	14.6178		15.3975	2
TWO COMPONENT TRANSCRIPTIONAL REGULATORY PROTEIN DEVR (PROBABLY LUXR/UHPA-FAMILY)	Rv3133c	CAB06281.1	I12	17.9873	15.4186	0.168556		15.1344		17.6821	20.2545	16.2	19.1597	19.493			15.1086		15.7729	14.9268	14.5172	16.7674	2
PROBABLE POLYPHOSPHATE KINASE PPK (POLYPHOSPHORIC ACID KINASE) (ATP-POLYPHOSPHATE PHOSPHOTRANSFERASE)	Rv2984	CAB05444.1	A12	17.0932	14.2792	0.1422		18.8508		14.3425		19.0665	16.389	16.8173	14.2026					14.6746	13.0459	15.1937	2

## Sheet: Potential Chart
LocusTag	Fold Change
Rv0005	0.918373
Rv0014c	10.105
Rv0035	0.949096
Rv0042c	1.16376
Rv0079	1.09124
Rv0088	0.961457
Rv0131c	1.21366
Rv0153c	1.32024
Rv0166	1.23954
Rv0178	1.1606
Rv0206c	0.910814
Rv0211	0.855124
Rv0214	1.07999
Rv0217c	1.2151
Rv0231	1.22959
Rv0242c	0.820184
Rv0244c	1.60365
Rv0247c	1.14609
Rv0282	0.757283
Rv0284	1.63534
Rv0379	1.50476
Rv0383c	1.32538
Rv0392c	1.16969
Rv0404	1.1611
Rv0414c	0.804009
Rv0421c	1.11827
Rv0426c	2.02047
Rv0439c	1.08963
Rv0440	0.901665
Rv0464c	1.03869
Rv0468	1.16483
Rv0470c	1.35985
Rv0474	1.37619
Rv0513	1.21475
Rv0523c	1.2645
Rv0524	1.29393
Rv0562	0.870518
Rv0564c	1.36814
Rv0570	1.87316
Rv0638	0.827189
Rv0642c	4.83626
Rv0644c	1.48164
Rv0667	1.22271
Rv0668	1.02468
Rv0675	2.85828
Rv0682	0.729424
Rv0685	1.00169
Rv0688	1.59882
Rv0694	0.345876
Rv0707	1.12045
Rv0716	0.827861
Rv0721	1.11072
Rv0757	1.44905
Rv0769	0.97353
Rv0820	1.17381
Rv0823c	1.0181
Rv0824c	0.947619
Rv0825c	1.44978
Rv0831c	1.77222
Rv0861c	1.26097
Rv0873	1.41375
Rv0914c	0.614944
Rv0931c	44.3391
Rv0933	1.03327
Rv0972c	1.70495
Rv1020	2.15229
Rv1132	0.689
Rv1154c	1.40245
Rv1185c	0.927355
Rv1193	0.822527
Rv1206	1.48609
Rv1245c	1.04598
Rv1248c	1.16163
Rv1261c	0.586148
Rv1267c	1.35717
Rv1286	1.82416
Rv1297	1.33549
Rv1304	1.08348
Rv1307	2.18701
Rv1308	1.21801
Rv1309	1.42793
Rv1310	0.849565
Rv1314c	1.92586
Rv1316c	1.46958
Rv1391	4.48687
Rv1404	1.35786
Rv1409	0.585943
Rv1423	1.61375
Rv1461	0.913302
Rv1463	1.12332
Rv1467c	1.14429
Rv1479	0.960603
Rv1483	0.870498
Rv1484	1.42757
Rv1488	0.955008
Rv1498c	0.906652
Rv1629	0.75565
Rv1636	0.876105
Rv1638	1.37024
Rv1679	0.635106
Rv1683	1.36759
Rv1713	1.22434
Rv1746	50
Rv1747	1.19651
Rv1751	0.962842
Rv1762c	1.38
Rv1770	1.64144
Rv1833c	0.748336
Rv1865c	1.30994
Rv1872c	3.37705
Rv1875	0.753669
Rv1896c	1.5446
Rv1915	1.12551
Rv1919c	0.851402
Rv1920	0.935131
Rv1978	1.02051
Rv2031c	1.11333
Rv2032	1.23844
Rv2054	0.89494
Rv2129c	1.15079
Rv2178c	0.545139
Rv2187	1.22969
Rv2196	1.06875
Rv2206	1.31119
Rv2222c	0.640901
Rv2245	1.30112
Rv2246	1.02097
Rv2247	1.10594
Rv2285	1.33813
Rv2296	1.38473
Rv2298	0.639342
Rv2299c	1.16462
Rv2342	1.16199
Rv2343c	1.43084
Rv2404c	0.859446
Rv2429	1.22351
Rv2455c	1.10333
Rv2457c	1.46948
Rv2466c	1.81431
Rv2483c	1.33392
Rv2486	0.775144
Rv2501c	1.32699
Rv2502c	1.4906
Rv2509	1.38009
Rv2524c	0.919272
Rv2583c	1.05151
Rv2586c	0.975602
Rv2606c	1.48472
Rv2622	1.16797
Rv2623	2.17191
Rv2629	0.937753
Rv2691	3.41068
Rv2703	1.36906
Rv2713	1.91147
Rv2715	1.19431
Rv2718c	2.68902
Rv2731	1.36493
Rv2744c	0.773702
Rv2751	0.895018
Rv2785c	0.433395
Rv2786c	2.0041
Rv2824c	1.13476
Rv2839c	1.37462
Rv2841c	0.949346
Rv2922c	1.17839
Rv2984	0.1422
Rv2986c	0.961498
Rv2992c	1.26878
Rv3034c	1.27076
Rv3045	1.0177
Rv3049c	1.07922
Rv3091	0.842242
Rv3102c	1.68791
Rv3133c	0.168556
Rv3139	1.25719
Rv3213c	0.965483
Rv3224	1.0641
Rv3265c	1.47173
Rv3269	1.3434
Rv3336c	1.83484
Rv3368c	0.884865
Rv3417c	1.20225
Rv3458c	1.12501
Rv3462c	0.912591
Rv3596c	1.29386
Rv3646c	0.852676
Rv3649	1.13633
Rv3667	2.25271
Rv3669	1.121
Rv3720	7.87267
Rv3808c	1.03748
Rv3818	1.7799
Rv3871	1.6508
Rv3876	1.68332
